# Supplementary material for: Berry-Derived Polyphenols in Cardiovascular Pathologies: Mechanisms of Disease and the Role of Diet and Sex
Source: PubMed Central journal article supplement (PMC7911141; doi:10.3390/nu13020387), 2021-01-27
Supplement: nutrients-13-00387-s001.pdf [file nutrients-13-00387-s001.pdf]

Supplementary

**Table S1.** Search terms used for study compilation.

| <b>Title/Abstract 1st term</b> | <b>AND</b> | <b>Title/Abstract 2nd term</b> | <b>AND</b> | <b>Title/Abstract 3rd term</b> |
|--------------------------------|------------|--------------------------------|------------|--------------------------------|
| Strawberry                     |            | Cardiovascular disease         |            | Sex differences                |
| Blackberry                     |            | Coronary artery disease        |            | Sex                            |
| Raspberry                      |            | Inflammation                   |            | Gender                         |
| Blueberry                      |            | Oxidative stress               |            |                                |
| Berries                        |            | Vascular                       |            |                                |
| Polyphenol                     |            | Hypertension                   |            |                                |
| Flavonoid                      |            | Heart Failure                  |            |                                |
| Anthocyanin                    |            | Hypertrophy                    |            |                                |
| Flavanol                       |            | Fibrosis                       |            |                                |
| Flavonol                       |            | Endothelial                    |            |                                |
| Phenolic acid                  |            | Vascular smooth muscle cell    |            |                                |
| Gallic acid                    |            | Cardiomyocyte                  |            |                                |
| Ellagic acid                   |            | MMP                            |            |                                |
| Caffeic acid                   |            | Nrf2                           |            |                                |
| Cyanidin                       |            | Sirt1                          |            |                                |
| Delphinidin                    |            | Nox                            |            |                                |
| Epicatechin                    |            | eNOS                           |            |                                |
| Resveratrol                    |            | TLR4                           |            |                                |
| Quercetin                      |            | TNFR                           |            |                                |
| Kaempferol                     |            | Apoptosis                      |            |                                |
| Myricetin                      |            | Bcl-2                          |            |                                |
| Urolithin                      |            | Bax                            |            |                                |
| Vanillic acid                  |            | p53                            |            |                                |
|                                |            | Estrogen                       |            |                                |
|                                |            | Metabolism                     |            |                                |
|                                |            | Microbiota                     |            |                                |

**Table S2.** Berry Polyphenols and Inflammation.

| <b>Author</b>                | <b>Subject Characteristics</b>                                                                 | <b>Intervention</b>                               | <b>Duration</b> | <b>Design</b>                                                 | <b>Findings</b>                                              |
|------------------------------|------------------------------------------------------------------------------------------------|---------------------------------------------------|-----------------|---------------------------------------------------------------|--------------------------------------------------------------|
| Aghababae, et al. 2015 [1]   | 54 males and 18 females with dyslipidemia                                                      | 300 mL/day blackberry juice with pulp             | 8 weeks         | Randomized trial                                              | ↓ <i>hs</i> -CRP                                             |
| An JH, et al. 2016 [2]       | 13 males and 31 females with prediabetes                                                       | 900 or 1800 mg per day of black raspberry extract | 12 weeks        | Randomized, double-blind, placebo-controlled study            | ↓ MCP-1                                                      |
| Basu A, et al. 2009 [3]      | 16 obese females with metabolic syndrome                                                       | 25 g/d freeze-dried strawberry                    | 4 weeks         | Repeated measures                                             | ↔ <i>hs</i> -CRP                                             |
| Basu A, et al. 2010a [4]     | 44 obese females and 4 obese males (~50 yo) with metabolic syndrome                            | 50 g/d freeze-dried blueberry                     | 8 weeks         | Randomized, single-blind, placebo-controlled trial            | ↔ <i>hs</i> -CRP, IL-6, ICAM-1, or VCAM-1                    |
| Basu A, et al. 2010b [5]     | 25 females and 2 males with metabolic syndrome and obesity                                     | 50 g/d freeze-dried strawberry                    | 8 weeks         | Randomized study                                              | ↓ VCAM-1                                                     |
| Basu A. et al. 2014 [6]      | 5 males and 55 females with obesity                                                            | 50 or 25 g/d freeze-dried strawberry              | 12 weeks        | Randomized study                                              | ↔ <i>hs</i> -CRP, VCAM-1, ICAM-1                             |
| Jeong HS, et al. 2014 [7]    | 36 males and 41 females with metabolic syndrome                                                | 750 mg/d black raspberry                          | 12 weeks        | Randomized, placebo-controlled trial                          | ↔ <i>hs</i> -CRP, ICAM-1, VCAM-1<br>↓ IL-6 and TNF- $\alpha$ |
| Jeong HS, et al. 2016 [8]    | 24 males and 21 females with pre-hypertension                                                  | 1,500 or 2,500 mg/d black raspberry               | 8 weeks         | Randomized, double-blinded, placebo-controlled clinical trial | ↔ <i>hs</i> -CRP, ICAM-1, VCAM-1<br>↓ IL-6 and TNF- $\alpha$ |
| Jeong HS, et al. 2016 [9]    | 51 middle aged females and males with metabolic syndrome                                       | 750 mg/d freeze-dried black raspberry             | 12 weeks        | Randomized, placebo-controlled trial                          | ↓ IL-6 and TNF- $\alpha$                                     |
| Johnson SA, et al. 2015 [10] | 48 postmenopausal females (45-65 years old) with pre-stage 1-hypertension                      | 22 g/d freeze-dried blueberry powder              | 8 weeks         | Randomized, double-blind, placebo-controlled clinical trial   | ↔ <i>hs</i> -CRP                                             |
| Karlsen A, et al. 2010 [11]  | 46 males (30-70 yo) and 17 postmenopausal females (45-70 yo) with at least one CVD risk factor | 330 ml/d bilberry juice                           | 4 weeks         | Parallel group, randomized, placebo-controlled trial          | ↓ <i>hs</i> -CRP, ↓ IL-6, ↑ TNF- $\alpha$                    |

|                               |                                                           |                                                                                                                                                    |                                                   |                                                             |                                                                                                                                             |
|-------------------------------|-----------------------------------------------------------|----------------------------------------------------------------------------------------------------------------------------------------------------|---------------------------------------------------|-------------------------------------------------------------|---------------------------------------------------------------------------------------------------------------------------------------------|
| Lehtonen HM, et al. 2011 [12] | 110 overweight and obese, premenopausal females           | Whole, frozen bilberries (BB)<br>Air dried sea buckthorn (SB)<br>SB phenolic extract (SBe)<br>SB oil (SBo)<br>Content equal to 100 g fresh berries | 33-35 d intervention followed by 30-39 d wash-out | Randomized, crossover design                                | ↓ VCAM-1 after BB and SBo<br>↓ ICAM-1 after SBe<br>↓ TNF- $\alpha$ after BB, SB, and SBe                                                    |
| Nair AR, et al. 2017 [13]     | 9 males and 18 females (53-62 yo) with metabolic syndrome | 45 g/d freeze-dried blueberry powder                                                                                                               | 6 weeks                                           | Randomized, double-blind, placebo-controlled clinical trial | ↓ mRNA of TNF- $\alpha$ , TLR4, and IL-6                                                                                                    |
| Schell J, et al. 2019 [14]    | 5 males and 20 females with type II diabetes              | 250 g fresh raspberry                                                                                                                              | 4 weeks                                           | randomized crossover study                                  | $\leftrightarrow$ <i>hs</i> -CRP, IL-1 $\beta$<br>↓ IL-6, TNF- $\alpha$                                                                     |
|                               |                                                           |                                                                                                                                                    | Postprandial                                      | randomized crossover study                                  | $\leftrightarrow$ <i>hs</i> -CRP, IL-1 $\beta$<br>↓ IL-6, TNF- $\alpha$                                                                     |
| Bhaskar S, et al. 2016 [15]   | Female, Sprague-Dawley rats                               | 25 mg/kg Quercetin                                                                                                                                 | 60 d                                              | High-cholesterol diet                                       | ↓ <i>hs</i> -CRP, ↓ IL-6 mRNA                                                                                                               |
| Liao HH, et al. 2019 [16]     | 8-10-week-old, male mice (C57BL/6)                        | 200 mg/kg/d myricetin                                                                                                                              | 6 weeks                                           | Pressure overload-induced HF                                | ↓ NF- $\kappa$ B and MAPK phosphorylation (with and without Nrf2 knockdown), ↓ TRAF6 expression and ubiquitination, ↓ TAK1 phosphorylation  |
| Zhang C, et al. 2012 [17]     | 1-3-day-old Sprague-Dawley rats (gender unspecified)      | 5, 10, or 20 $\mu$ M resveratrol                                                                                                                   | Applied 5 min after reoxygenation                 | A/R injury model (3 h anoxia, 2 h reoxygenation)            | ↓ TLR4 mRNA and protein, ↓ NF- $\kappa$ B p65, ↑ I $\kappa$ B $\alpha$ , ↓ TNF- $\alpha$ , ↓ IL-1 $\beta$                                   |
| Bhaskar S, et al. 2016 [15]   | HUVEC                                                     | Quercetin                                                                                                                                          | 1 h                                               | 24 h 50 $\mu$ M/ml oxidized LDL                             | ↓ VCAM-1, ↓ ICAM-1, ↑ cytosolic NF- $\kappa$ B p65, ↓ nuclear NF- $\kappa$ B p65, ↓ TLR4 mRNA                                               |
| Feresin RG, et al. 2016 [18]  | Rat aortic VSMC (male donor)                              | 200 $\mu$ g/mL polyphenolic extract of freeze-dried blackberries (BL), raspberries (RB), and black raspberries (BRB)                               | 24 h                                              | 72 h 100 nM Ang II                                          | ↓ Ang II-induced ERK1/2 and p38MAPK phosphorylation by all berry extracts<br>↓ Ang II-induced Akt phosphorylation by BL and BRB, but not RB |

|                             |                                   |                                                                                                                                                                                   |        |                                |                                                                                                                                                                                                                                                                                                                                                                                                                                                                                                                                                                                                        |
|-----------------------------|-----------------------------------|-----------------------------------------------------------------------------------------------------------------------------------------------------------------------------------|--------|--------------------------------|--------------------------------------------------------------------------------------------------------------------------------------------------------------------------------------------------------------------------------------------------------------------------------------------------------------------------------------------------------------------------------------------------------------------------------------------------------------------------------------------------------------------------------------------------------------------------------------------------------|
|                             |                                   |                                                                                                                                                                                   |        |                                | Mv-3-glc generally showed a stronger inhibitory effect than Mv-3-gal<br>50 and 100 $\mu$ M Mv-3-glc inhibited ICAM-1 and VCAM-1 by >50%, all concentrations<br>$\downarrow$ MCP-1 and ICAM-1 mRNA<br>50 and 100 $\mu$ M Mv-3-gal inhibited ICAM-1 and VCAM-1 by > 50%, all concentrations<br>$\downarrow$ ICAM-1 mRNA, 50 and 100 $\mu$ M $\downarrow$ MCP-1 mRNA<br>More effective at inhibiting ICAM-1 in combination versus isolation, all concentrations<br>$\downarrow$ MCP-1 and ICAM-1 mRNA<br>All concentrations (in combination and isolation) $\downarrow$ I $\kappa$ B $\alpha$ degradation |
| Huang WY, et al. 2014 [19]  | HUVEC                             | 1, 10, 50, or 100 $\mu$ M Malvidin-3-glucoside (Mv-3-glc)<br>Malvidin-3-galactoside (Mv-3-gal)<br>Mv-3-glc + Mv-3-gal                                                             | 18 h   | 6 h 10 $\mu$ g/L TNF- $\alpha$ |                                                                                                                                                                                                                                                                                                                                                                                                                                                                                                                                                                                                        |
| Hung CH, et al. 2015 [20]   | HUVEC                             | 10 $\mu$ M quercetin                                                                                                                                                              | 1 h    | 150 $\mu$ M/ml oxidized LDL    | $\downarrow$ NF- $\kappa$ B activity,<br>$\downarrow$ IL-8 secretion,<br>$\downarrow$ ICAM-1, $\downarrow$ VCAM-1                                                                                                                                                                                                                                                                                                                                                                                                                                                                                      |
| Karlsen A, et al. 2010 [11] | Human monocytic cell line         | 25 and 50 $\mu$ mol/L quercetin<br>50 $\mu$ mol/L resveratrol<br>25 $\mu$ mol/L epicatechin<br>50 $\mu$ mol/L myricetin<br>50 $\mu$ mol/L petunidin<br>50 $\mu$ mol/L delphinidin | 30 min | 6 h 1 $\mu$ g/ml LPS           | Quercetin, resveratrol, and epicatechin $\downarrow$ NF- $\kappa$ B<br>myricetin, petunidin and delphinidin $\uparrow$ NF- $\kappa$ B                                                                                                                                                                                                                                                                                                                                                                                                                                                                  |
| Li T, et al. 2019 [21]      | Murine macrophage RAW 264.7 cells | 6 $\mu$ M Quercetin +<br>150 $\mu$ M Catechin<br>or                                                                                                                               | 24 h   | 24 h 1 $\mu$ g/ml LPS          | Quercetin - $\downarrow$ TNF- $\alpha$ ,<br>$\downarrow$ IL-1 $\beta$ , $\downarrow$ p-p38MAPK, $\downarrow$ p-ERK, $\downarrow$ TLR4 mRNA, $\uparrow$                                                                                                                                                                                                                                                                                                                                                                                                                                                 |

|                                    |                                                   |                                              |        |                                                          |                                                                                                                                                                                                                                                                                                                       |
|------------------------------------|---------------------------------------------------|----------------------------------------------|--------|----------------------------------------------------------|-----------------------------------------------------------------------------------------------------------------------------------------------------------------------------------------------------------------------------------------------------------------------------------------------------------------------|
|                                    |                                                   | 3 $\mu$ M Quercetin +<br>75 $\mu$ M Catechin |        |                                                          | MyD88 mRNA, $\downarrow$ TRAF6 mRNA, $\uparrow$ TAK1 mRNA                                                                                                                                                                                                                                                             |
|                                    |                                                   |                                              |        |                                                          | Catechin - $\downarrow$ TNF- $\alpha$ , $\downarrow$ IL-1 $\beta$ ,<br>$\downarrow$ p-JNK, $\downarrow$ p-p38MAPK, $\downarrow$ p-ERK, $\downarrow$ TLR4 mRNA,<br>$\downarrow$ TRAF6 mRNA,<br>$\uparrow$ TAK1 mRNA                                                                                                    |
|                                    |                                                   |                                              |        |                                                          | Quercetin + Catechin -<br>$\downarrow\downarrow$ TNF- $\alpha$ , $\downarrow\downarrow$ IL-1 $\beta$ ,<br>$\downarrow$ NF- $\kappa$ B p65, $\downarrow$ p-JNK,<br>$\downarrow$ p-p38MAPK, $\downarrow$ p-ERK,<br>$\downarrow$ TLR4 mRNA, $\downarrow$ MyD88 mRNA, $\downarrow$ TRAF6 mRNA,<br>$\uparrow$ TAK1 mRNA    |
| Nwachukwu JC, et al. 2014 [22]     | MCF-7 breast cancer cells                         | 10 $\mu$ M Resveratrol                       | 24 h   | 24 h 1 ng/ml TNF- $\alpha$                               | Suppressed TNF- $\alpha$ -induced $\uparrow$ in IL-6 (similar to E2) – reversed by ICI, indicating ER-dependent mechanism<br>Almost all E2-regulated genes were modulated by resveratrol<br>Genes that were altered in the opposite direction as of TNF- $\alpha$ activity were more sensitive to resveratrol than E2 |
| Olson ER, et al. 2005 [23]         | Cardiac fibroblasts from male Sprague-Dawley rats | 25 $\mu$ M resveratrol                       | 30 min | 100 nM Ang II or 200 pM TGF- $\beta$                     | $\downarrow$ phosphorylation of MEK and ERK1/2                                                                                                                                                                                                                                                                        |
| Sivasinprasasn S, et al. 2016 [24] | HUVEC (EA.hy926)                                  | 5, 10, or 20 $\mu$ M C3G                     | 2 h    | C3G exposure, followed by 24 h 1 $\mu$ M Ang II exposure | $\uparrow$ I $\kappa$ B $\alpha$ , $\downarrow$ total NF- $\kappa$ B p65, $\uparrow$ cytosolic NF- $\kappa$ B p65, $\downarrow$ nuclear NF- $\kappa$ B p65                                                                                                                                                            |

$\uparrow$  denotes an increase,  $\downarrow$  denotes a decrease, and  $\square$  indicates no change. Abbreviations: E2, estradiol; ERL extracellular receptor kinase; hs-CRP, high-sensitivity C-reactive protein; ICAM-1, intracellular adhesion molecule 1; I $\kappa$ B $\alpha$ , inhibitor of nuclear factor kappa B; IL-6, interleukin-6; MCP-1, monocyte chemoattractant

---

protein-1; MAPK, mitogen-activated protein kinase; MEK, mitogen-activated protein kinase kinase; Myd88, myeloid differentiation primary response 88; NF- $\kappa$ B, nuclear factor kappa-light-chain-enhancer of activated B cells; TAK1, transforming growth factor beta-activated kinase 1; TLR4, toll-like receptor-4; TNF- $\alpha$ , tumor necrosis factor alpha; TRAF6, TNF receptor associated factor 6; VCAM-1, vascular cell adhesion molecule 1.

**Table S3.** Berry Polyphenols and Oxidative Stress.

| Author                             | Subject Characteristics                                             | Intervention                                      | Duration      | Design                                                        | Findings                                                                             |
|------------------------------------|---------------------------------------------------------------------|---------------------------------------------------|---------------|---------------------------------------------------------------|--------------------------------------------------------------------------------------|
| Aghababae, et al. 2015 [1]         | 54 males and 18 females with dyslipidemia                           | 300 mL/day blackberry juice with pulp             | 8 weeks       | Randomized trial                                              | ↓ SBP<br>↔ DBP                                                                       |
| An JH, et al. 2016 [2]             | 13 males and 31 females with prediabetes                            | 900 or 1800 mg per day of black raspberry extract | 12 weeks      | Randomized, double-blind, placebo-controlled study            | ↓ Oxidized LDL                                                                       |
| Basu A, et al. 2009 [3]            | 16 obese females with metabolic syndrome                            | 25 g/d freeze-dried strawberry                    | 4 weeks       | Repeated measures                                             | ↔ Oxidized LDL<br>↓ malondialdehyde and hydroxynonenal                               |
| Basu A, et al. 2010a [4]           | 44 obese females and 4 obese males (~50 yo) with metabolic syndrome | 50 g/d freeze-dried blueberry powder              | 8 weeks       | Randomized, single-blind, placebo-controlled trial            | Greater ↓ in SBP, DBP, oxLDL, malondialdehyde, and hydroxynonenal than control group |
| Basu A, et al. 2014 [6]            | 5 males and 55 females with obesity                                 | 50 or 25 g/d freeze-dried strawberry              | 12 weeks      | Randomized study                                              | ↔ SBP and DBP<br>↓ malondialdehyde and hydroxynonenal                                |
| Burton-Freeman B, et al. 2010 [25] | 5 females and 10 males with hyperlipidemia                          | 10 g freeze-died strawberry                       | 12 weeks      | Randomized single-blind, placebo-controlled crossover trial   | ↓ oxidized LDL                                                                       |
| Djurica D, et al. 2016 [26]        | 25 obese or overweight males                                        | 50 g freeze-dried strawberry powder               | Postprandial  | Randomized, double-blind, cross-over                          | ↑ NO levels                                                                          |
|                                    |                                                                     |                                                   | 1 week        | Randomized, double-blind, cross-over                          | ↔ SBP and DBP<br>↑ NO levels                                                         |
| Feresin RG, et al. 2017 [27]       | 71 pre- and stage 1-hypertensive postmenopausal females             | 50 or 25 g/d freeze-dried strawberry              | 4 and 8 weeks | Randomized double-blind, placebo controlled study             | ↓ arterial stiffness and SBP with 25 g/d<br>↑ NO levels with 50 g/d                  |
| Istas G, et al. 2018 [28]          | 10 healthy males                                                    | 200 g and 400 g of red raspberries                | 2 h and 24 h  | Postprandial                                                  | ↑ FMD and arterial stiffness                                                         |
| Jeong HS, et al. 2016 [8]          | 24 males and 21 females with pre-hypertension                       | 1,500 or 2,500 mg/d black raspberry               | 8 weeks       | Randomized, double-blinded, placebo-controlled clinical trial | ↔ DBP<br>↓ SBP                                                                       |

|                                      |                                                                        |                                                                                                                                      |                                                                                    |                                                                        |                                                                                               |
|--------------------------------------|------------------------------------------------------------------------|--------------------------------------------------------------------------------------------------------------------------------------|------------------------------------------------------------------------------------|------------------------------------------------------------------------|-----------------------------------------------------------------------------------------------|
| Jeong HS, et al. 2016 [9]            | 51 middle aged females and males with metabolic syndrome               | 750 mg/d freeze-dried black raspberry                                                                                                | 12 weeks                                                                           | Randomized, double-blinded, placebo-controlled clinical trial          | ↑ FMD                                                                                         |
| Johnson SA, et al. 2015 [10]         | 48 postmenopausal females (45-65 yo) with pre- or stage 1-hypertension | 22 g/d freeze-dried blueberry powder                                                                                                 | 8 weeks                                                                            | Randomized, double-blind, placebo-controlled clinical trial            | ↓ SBP and DBP, ↑ NO levels                                                                    |
| Kay CD & Holub BJ. 2007 [29]         | 8 middle aged males                                                    | 100 g freeze-dried wild blueberry powder                                                                                             | Repeated measures                                                                  | Postprandial                                                           | ↑ serum antioxidant capacity                                                                  |
| Marniemi J, et al. 2000 [30]         | 40 sixty-year old males                                                | 100 g of bilberries, lingonberries, or black currants                                                                                | 8 weeks                                                                            | Randomized                                                             | ↑ serum antioxidant capacity                                                                  |
| Mathison BD, et al. 2014 [31]        | 6 healthy males and 6 healthy females                                  | 16 oz. cranberry juice                                                                                                               | Postprandial                                                                       | Repeated measures                                                      | ↑ SOD and GPx                                                                                 |
| Mazza G, et al. 2002 [32]            | 5 healthy males                                                        | 100 g freeze-dried wild-blueberry powder                                                                                             | Postprandial                                                                       | Repeated measures                                                      | ↑ serum antioxidant capacity                                                                  |
| McLeay Y, et al. 2012 [33]           | 10 healthy females                                                     | 200 g frozen New Zealand blueberries                                                                                                 | 12 h and 36 h post exercise                                                        | Randomized cross-over study                                            | ↑ serum antioxidant capacity                                                                  |
| Nair AR, et al. 2017 [13]            | 9 males and 18 females (53-62 yo) with metabolic syndrome              | 45 g/d freeze-dried blueberry powder                                                                                                 | 6 weeks                                                                            | Randomized, double-blind, placebo-controlled clinical trial            | ↓ ROS, ↓ O <sub>2</sub> <sup>-</sup>                                                          |
| Netzel M, et al. 2002 [34]           | 3 healthy males and 3 healthy females                                  | 400 ml juice containing 30% white grape-, 25% blackcurrant-, 15% elderberry-, 10% sour cherry-, 10% blackberry- and 10% aronia-juice | Postprandial                                                                       | Repeated measures                                                      | ↑ serum antioxidant capacity<br>↓ malondialdehyde                                             |
| Netzel M, et al. 2005 [35]           | 4 healthy males and 4 healthy females                                  | 200, 300 or 400 ml of elderberry juice                                                                                               | Postprandial                                                                       | Repeated measures                                                      | ↑ serum antioxidant capacity                                                                  |
| Rodriguez-Mateos A, et al. 2013 [36] | 21 healthy males (25-29 yo)                                            | freeze-dried wild-blueberry powder<br>766, 1278, and 1791 mg total blueberry polyphenols                                             | Time-course trial - assessment at baseline, and 1, 2, 4, and 6 h after consumption | Randomized, double-blind, placebo-controlled, crossover clinical trial | ↑ postprandial FMD with all doses, peaked at 1-2 h and 6 h post-consumption<br>↓ Nox activity |



|                              |                                                                     |                                                                              |                                                                           |                                                                        |                                                                                                                                                        |
|------------------------------|---------------------------------------------------------------------|------------------------------------------------------------------------------|---------------------------------------------------------------------------|------------------------------------------------------------------------|--------------------------------------------------------------------------------------------------------------------------------------------------------|
|                              |                                                                     | 319, 637, 766, 1278, and 1791 mg total blueberry polyphenols                 | Dose-dependency trial – assessment at baseline, and 1 h after consumption | Randomized, double-blind, placebo-controlled, crossover clinical trial | Endothelial function ↑ linearly up to 766 mg, then plateaued/↓ slightly at higher intakes                                                              |
| Schell J, et al. 2019 [14]   | 5 males and 20 females with type II diabetes                        | 250 g fresh raspberry                                                        | 4 weeks                                                                   | randomized crossover study                                             | ↔ small and large artery elasticity and DBP<br>↓ SBP                                                                                                   |
|                              |                                                                     |                                                                              | Postprandial                                                              | randomized crossover study                                             | ↔ small and large artery elasticity, SBP and DBP                                                                                                       |
| Tulipani S, et al. 2009 [37] | 3 healthy males and 5 healthy females                               | 1 kg of fresh strawberries                                                   | Postprandial                                                              | Repeated measures                                                      | ↑ serum antioxidant capacity                                                                                                                           |
| Ding Y, et al. 2014 [38]     | 4-week-old, wild-type and ApoE <sup>-/-</sup> , male mice (C57BL/6) | 30 mg/kg/d ellagic acid                                                      | 14 weeks                                                                  | High-fat diet                                                          | ↑ aortic Nrf2 and HO-1 expression, ↓ F2-isoprostane, ↑ NOS activity, ↑ endothelium-dependent vasodilation                                              |
| Jin L, et al. 2017 [39]      | 4-week-old, male SHR                                                | 1% gallic acid in drinking water                                             | 16 weeks                                                                  | Model of essential hypertension                                        | ↓ ACE and AT <sub>1</sub> R expression, ↓ Nox activity and ↓ Nox1, Nox2, and Nox4 mRNA                                                                 |
| Kalea AZ, et al. 2010 [40]   | Weanling, male SHR                                                  | 8% freeze-dried blueberry powder                                             | 7 weeks                                                                   | Model of essential hypertension development                            | Promotes ↑ basal NO-dependent dilation and COX-mediated constriction<br>↑ endothelium-dependent dilation and vessel sensitivity                        |
| Kane M, et al. 2009 [41]     | 12-14-week-old, female and male Wistar rats                         | 10 <sup>-4</sup> to 10 <sup>-1</sup> mg/ml red wine polyphenols (RWP) powder | Unspecified exposure time                                                 | Sex-specific assessment of vascular function                           | ↑ RWP-induced endothelium-dependent relaxation due to ↑ antioxidant enzyme and ↑ phosphorylation of eNOS<br>↑ relaxation response in females vs. males |

|                           |                                                     |                                                   |                                |                                             |                                                                                                                                                        |
|---------------------------|-----------------------------------------------------|---------------------------------------------------|--------------------------------|---------------------------------------------|--------------------------------------------------------------------------------------------------------------------------------------------------------|
|                           |                                                     |                                                   |                                |                                             | ER-independent mechanism                                                                                                                               |
| Li M, et al. 2013 [42]    | Male Wistar rats                                    | 25 or 50 mg/kg quercetin or rutin                 | 21 d                           | Isoproterenol HF model (15 mg/kg)           | Quercetin and rutin dose-dependently suppressed ↑ in malondialdehyde and ↓ in SOD activity                                                             |
| Liao HH, et al. 2019 [16] | 8-10-week-old, male mice (C57BL/6)                  | 200 mg/kg/d myricetin                             | 6 weeks                        | Pressure overload-induced HF                | ↑ Nrf2, ↑ HO-1                                                                                                                                         |
| Wang Y, et al. 2012 [43]  | 8-week-old, male ApoE <sup>-/-</sup> mice (C57BL/6) | 2 g/kg cyanidin-3-glucoside (C3G)                 | 8 weeks                        | High-fat, high-cholesterol diet             | ↓ aortic O <sub>2</sub> , ↑ nitrite and nitrate, ↑ endothelium-dependent vasodilation, ↑ phosphorylated eNOS, ↑ cGMP                                   |
| Yan X, et al. 2020 [44]   | 8-12-week-old, male mice (C57BL/6)                  | 5 and 20 mg/kg/d gallic acid                      | 2 weeks                        | Ang-II (490 ng/kg/min) induced hypertension | ↓ BP, ↑ endothelium-dependent vasodilation, ↑ total and phosphorylated aortic eNOS                                                                     |
| Zheng D, et al. 2020 [45] | 7-week-old, male Sprague Dawley rats                | 0.7 mg/kg - intraperitoneal injection urolithin B | 0, 24, and 48 h before surgery | I/R model of HF                             | ↓ O <sub>2</sub> , ↓ lipid peroxidation, restored SOD level, protected against p62 reductions, ↑ nuclear Nrf2, ↑ p62-Keap1 interaction, ↑ HO-1, ↑ NQO1 |
| Hung CH, et al. 2015 [20] | HUVEC                                               | 2.5, 5, or 10 μM quercetin                        | 24 h                           | 150 μM/ml oxidized LDL                      | ↑ Sirt1 expression, ↓ oxidized LDL-induced reductions of Sirt1 expression                                                                              |
|                           |                                                     | 2.5, 5, or 10 μM quercetin                        | 2 h                            | 150 μM/ml oxidized LDL                      | Quercetin – ↑ Sirt1 expression in dose dependent manner                                                                                                |
|                           |                                                     | 20 μM resveratrol                                 |                                |                                             | Resveratrol – greatest ↑ Sirt1 expression                                                                                                              |
|                           |                                                     | 10 μM Quercetin                                   | 24 h                           | 150 μM/ml oxidized LDL                      | ↑ Nox2 and Nox4 expression, ↓ ROS (which was re-                                                                                                       |

|                                   |                                                           |                                                                                                                 |      |                                                     |  |                                                                                                                                                                                                                                                                                                                                                                                                                                                                                                                                                                                                  |
|-----------------------------------|-----------------------------------------------------------|-----------------------------------------------------------------------------------------------------------------|------|-----------------------------------------------------|--|--------------------------------------------------------------------------------------------------------------------------------------------------------------------------------------------------------------------------------------------------------------------------------------------------------------------------------------------------------------------------------------------------------------------------------------------------------------------------------------------------------------------------------------------------------------------------------------------------|
|                                   |                                                           |                                                                                                                 |      |                                                     |  | versed with SIRT1 silencing), protected against oxidized LDL-induced reductions of eNOS expression                                                                                                                                                                                                                                                                                                                                                                                                                                                                                               |
|                                   |                                                           |                                                                                                                 |      |                                                     |  | ↓ basal and Ang II-induced H <sub>2</sub> O <sub>2</sub> by all berry extracts<br>↓ basal O <sub>2</sub> by BL, but not RB or BRB<br>↓ Ang II-induced O <sub>2</sub> by all berry extracts<br>↓ NADP/NADPH ratio by all berry extracts, but greatest ↓ by BL<br>↓ Nox1 expression by BL, but not RB or BRB<br>↔ Nox4 expression, regardless of berry extract<br>↔ Ang II-induced downregulation of catalase, regardless of berry extract<br>↑ basal and Ang II-treated SOD1 expression by all berry extracts<br>↑ basal and Ang II-treated SOD2 and GPx1 expression by RB and BRB, but not by BL |
| Feresin RG, et al. 2016 [18]      | Rat aortic VSMC                                           | 200 µg/mL polyphenolic extract of freeze-dried blackberries (BL), raspberries (RB), and black raspberries (BRB) | 24 h | 72 h 100 nM Ang II                                  |  |                                                                                                                                                                                                                                                                                                                                                                                                                                                                                                                                                                                                  |
| Sivasinprasad S, et al. 2016 [24] | HUVEC (cell line EA.hy926)                                | 5, 10, or 20 µM cyanidin-3-glucoside (C3G)                                                                      | 2 h  | C3G exposure, followed by 24 h 1 µM Ang II exposure |  | ↓ ROS, ↓ iNOS, ↑ total Nrf2 content, ↓ cytosolic Nrf2, ↑ nuclear Nrf2, ↑ HO-1, ↑ SOD                                                                                                                                                                                                                                                                                                                                                                                                                                                                                                             |
| Xu JW, et al. 2007 [46]           | Bovine artery and mouse kidney vascular endothelial cells | 5 or 50 µM cyanidin                                                                                             | 24 h | 50 ng/mL TNF-α-induced endothelial cell apoptosis   |  | ↑ eNOS expression<br>Suppressed ↓ in intracellular glutathione                                                                                                                                                                                                                                                                                                                                                                                                                                                                                                                                   |

---

↑ denotes an increase, ↓ denotes a decrease, and ⇔ indicates no change. Abbreviations: ACE, angiotensin converting enzyme; Ang II, angiotensin II; AT<sub>1</sub>R, angiotensin II type-1 receptor; COX, cyclooxygenase; DBP, diastolic blood pressure; eNOS, endothelial nitric oxide synthase; FMD, flow-mediated dilation; GPx1, Glutathione peroxidase 1; H<sub>2</sub>O<sub>2</sub>, hydrogen peroxide; HO-1, heme oxygenase 1; iNOS, inducible nitric oxide synthase; KEAP1, kelch-like ECH-associated protein 1; NO, nitric oxide; Nox, NADPH-oxidase; Nrf2, nuclear factor erythroid 2-related factor 2; NQO1, NADPH quinone dehydrogenase 1; O<sub>2</sub><sup>-</sup>, superoxide; ROS, reactive oxygen species; SBP, systolic blood pressure; Sirt1, sirtuins 1; SOD, superoxide dismutase.

**Table S4.** Berry Polyphenols and Pathological Remodeling.

| Author                    | Subject Characteristics                                     | Intervention                                                                                                           | Duration                                                                                                 | Design                                           | Findings                                                                                                                                                                        |
|---------------------------|-------------------------------------------------------------|------------------------------------------------------------------------------------------------------------------------|----------------------------------------------------------------------------------------------------------|--------------------------------------------------|---------------------------------------------------------------------------------------------------------------------------------------------------------------------------------|
| Ruel G, et al. 2009 [47]  | 30 healthy, sedentary, abdominally obese males (41 – 61 yo) | Low-calorie cranberry juice cocktail<br>Bout 1 – 125 ml/d<br>Bout 2 – 250 ml/d<br>Bout 3 – 500 ml/d                    | 12 weeks total (3 bouts of 4 weeks each)                                                                 | Repeated measures trial                          | ↓ plasma MMP9 (week 12 vs. baseline)<br>↓ in MMP9 was associated with ↑ plasma nitrate/nitrite                                                                                  |
| Ahmet I, et al. 2009 [48] | 2-month-old, male Fischer-344 rats                          | 2% blueberry-enriched diet                                                                                             | 3 months prior to surgery and 10 weeks following surgery (half of each group crossed over to other diet) | Model of ischemic HF (coronary artery ligation)  | ↓ necrotic infarct area, ↓ apoptotic cell death                                                                                                                                 |
| Jin L, et al. 2017 [39]   | 4-week-old, male SHR                                        | 1% gallic acid in drinking water                                                                                       | 16 weeks                                                                                                 | Model of essential hypertension                  | ↓ aortic wall thickness compared to SHR with no gallic acid                                                                                                                     |
| Jin L, et al. 2018a [49]  | 4-week-old, male Wistar-Kyoto and SHR                       | 1% gallic acid in drinking water                                                                                       | 16 weeks                                                                                                 | Model of essential hypertension                  | ↓ cardiac hypertrophy,<br>↓ all CaMKII isoforms,<br>↓ caspase 3 expression,<br>↓ Bax expression and mRNA                                                                        |
| Jin L, et al. 2018b [50]  | 6-week-old, male mice (CD-1)                                | 100 mg/kg/d gallic acid (GA) compared to losartan 3 mg/kg/d (L), carvedilol 1 mg/kg/d (C), or furosemide 3 mg/kg/d (F) | 2 weeks following surgery                                                                                | Aortic constriction HF model                     | GA ↓ perivascular fibrosis, ↓ collagen I expression, ↓ fibronectin, and ↓ MMP2 mRNA, but ↔ with L, C, or F ↔ in MMP9 or MMP13 mRNA with GA, L, C, or F<br>GA ↓ TGF-β1 signaling |
| Yan X, et al. 2020 [44]   | 8-12-week-old, male mice (C57BL/6)                          | 5 and 20 mg/kg/d gallic acid                                                                                           | 2 weeks                                                                                                  | Ang II (490 ng/kg/min) induced hypertension      | ↓ Ang II-induced aortic wall thickening and collagen deposition, ↓ collagen I and collagen III mRNA expression                                                                  |
| Zhang C, et al. 2012 [17] | 1-3-d-old Sprague-Dawley rats                               | 5, 10, or 20 μM resveratrol                                                                                            | Applied 5 min after reoxygenation                                                                        | A/R injury model (3 h anoxia, 2 h reoxygenation) | Dose-dependent ↓ in apoptotic cell death,                                                                                                                                       |

|                              |                                                   |                                                                                                                 |                                |                                                   |                                                                                                                                                                                                                   |
|------------------------------|---------------------------------------------------|-----------------------------------------------------------------------------------------------------------------|--------------------------------|---------------------------------------------------|-------------------------------------------------------------------------------------------------------------------------------------------------------------------------------------------------------------------|
|                              |                                                   |                                                                                                                 |                                |                                                   | ↓ caspase 3 activity                                                                                                                                                                                              |
| Zheng D, et al. 2020 [45]    | 7-week-old, male Sprague Dawley rats              | 0.7 mg/kg - intraperitoneal injection urolithin B                                                               | 0, 24, and 48 h before surgery | I/R model of HF                                   | ↓ apoptotic cell death, ↓ cleaved caspase 3                                                                                                                                                                       |
| Choi YJ, et al. 2003 [51]    | HUVEC                                             | 50 μmol/L quercetin<br>50 μmol/L catechin<br>50 μmol/L epigallocatechin gallate (EGCG)                          | 30 min                         | 30 min 250 μmol/L H <sub>2</sub> O <sub>2</sub>   | Quercetin and EGCG ↓ H <sub>2</sub> O <sub>2</sub> -induced apoptotic cell death, but catechin did not ↓ DNA fragmentation by all treatments<br>Quercetin and EGCG restored Bcl-2, ↓ Bax, and ↓ cleaved caspase 3 |
| Feresin RG, et al. 2016 [18] | Rat aortic VSMC                                   | 200 μg/mL polyphenolic extract of freeze-dried blackberries (BL), raspberries (RB), and black raspberries (BRB) | 24 h                           | 72 h 100 nM Ang II                                | ↓ p53 protein expression by all berry extracts, but greatest ↓ by BL                                                                                                                                              |
| Hung CH, et al. 2015 [20]    | HUVEC                                             | 10 μM quercetin                                                                                                 | 24 h                           | 150 μM/ml oxidized LDL                            | ↑ Akt phosphorylation, ↓ cytosolic Cyt c                                                                                                                                                                          |
| Isaak CK, et al. 2017 [52]   | H9c2 rat cardiomyoblasts                          | 10 ng/mL lingonberry anthocyanins (cyanidin-3-galactoside, cyanidin-3-glucoside, and cyanidin-3-arabinoside)    | 24 h                           | 2 h 600 μM/L H <sub>2</sub> O <sub>2</sub>        | ↓ H <sub>2</sub> O <sub>2</sub> -induced apoptosis and ↓ caspase 3 activation in combination and isolation                                                                                                        |
| Olson ER, et al. 2005 [23]   | Cardiac fibroblasts from male Sprague-Dawley rats | 25 μM resveratrol                                                                                               | 30 min                         | 100 nM Ang II or 200 pM TGF-β                     | ↓ α-smooth muscle actin                                                                                                                                                                                           |
| Xu JW, et al. 2007 [46]      | Bovine artery endothelial cells                   | 5 or 50 μM cyanidin                                                                                             | 24 h                           | 50 ng/mL TNF-α-induced endothelial cell apoptosis | Dose-dependent ↓ TNF-α-induced cell death<br>Suppressed ↑ in cleaved caspase 3<br>↑ ERK1/2 and Akt phosphorylation                                                                                                |

↑ denotes an increase, ↓ denotes a decrease, and  $\square$  indicates no change. Abbreviations: Akt, protein kinase B; Ang, angiotensin; Bax, Bcl-2-associated X protein; Bcl-2, B-cell lymphoma 2; Cyt C, cytochrome C; ERK1/2, extracellular receptor kinase; H<sub>2</sub>O<sub>2</sub>, hydrogen peroxide; MMP, matrix metalloproteinase; SHR, spontaneously hypertensive rats; TGF-β, transforming growth factor beta; TNF-α, tumor necrosis factor alpha.

---

## References

1. Aghababae, S.; Vafa, M.; Shidfar, F.; Tahavorgar, A.; Gohari, M.; Katebi, D.; Mohammadi, V. Effects of blackberry (*Morus nigra* L.) consumption on serum concentration of lipoproteins, apo A-I, apo B, and high-sensitivity-C-reactive protein and blood pressure in dyslipidemic patients. *J Res Med Sci* **2015**, *20*, 684-691, doi:10.4103/1735-1995.166227.
2. An, J.H.; Kim, D.L.; Lee, T.B.; Kim, K.J.; Kim, S.H.; Kim, N.H.; Kim, H.Y.; Choi, D.S.; Kim, S.G. Effect of *Rubus Occidentalis* Extract on Metabolic Parameters in Subjects with Prediabetes: A Proof-of-concept, Randomized, Double-blind, Placebo-controlled Clinical Trial. *Phytother Res* **2016**, *30*, 1634-1640, doi:10.1002/ptr.5664.
3. Basu, A.; Wilkinson, M.; Penugonda, K.; Simmons, B.; Betts, N.M.; Lyons, T.J. Freeze-dried strawberry powder improves lipid profile and lipid peroxidation in women with metabolic syndrome: baseline and post intervention effects. *Nutr J* **2009**, *8*, doi:10.1186/1475-2891-8-43.
4. Basu, A.; Du, M.; Leyva, M.J.; Sanchez, K.; Betts, N.M.; Wu, M.; Aston, C.E.; Lyons, T.J. Blueberries decrease cardiovascular risk factors in obese men and women with metabolic syndrome. *J Nutr* **2010**, *140*, 1582-1587, doi:10.3945/jn.110.124701.
5. Basu, A.; Fu, D.X.; Wilkinson, M.; Simmons, B.; Wu, M.; Betts, N.M.; Du, M.; Lyons, T.J. Strawberries decrease atherosclerotic markers in subjects with metabolic syndrome. *Nutr Res* **2010**, *30*, 462-469, doi:10.1016/j.nutres.2010.06.016.
6. Basu, A.; Betts, N.M.; Nguyen, A.; Newman, E.D.; Fu, D.; Lyons, T.J. Freeze-dried strawberries lower serum cholesterol and lipid peroxidation in adults with abdominal adiposity and elevated serum lipids. *J Nutr* **2014**, *144*, 830-837, doi:10.3945/jn.113.188169.
7. Jeong, H.S.; Hong, S.J.; Lee, T.B.; Kwon, J.W.; Jeong, J.T.; Joo, H.J.; Park, J.H.; Ahn, C.M.; Yu, C.W.; Lim, D.S. Effects of black raspberry on lipid profiles and vascular endothelial function in patients with metabolic syndrome. *Phytother Res* **2014**, *28*, 1492-1498, doi:10.1002/ptr.5154.
8. Jeong, H.S.; Hong, S.J.; Cho, J.Y.; Lee, T.B.; Kwon, J.W.; Joo, H.J.; Park, J.H.; Yu, C.W.; Lim, D.S. Effects of *Rubus occidentalis* extract on blood pressure in patients with prehypertension: Randomized, double-blinded, placebo-controlled clinical trial. *Nutrition* **2016**, *32*, 461-467, doi:10.1016/j.nut.2015.10.014.
9. Jeong, H.S.; Kim, S.; Hong, S.J.; Choi, S.C.; Choi, J.H.; Kim, J.H.; Park, C.Y.; Cho, J.Y.; Lee, T.B.; Kwon, J.W., et al. Black Raspberry Extract Increased Circulating Endothelial Progenitor Cells and Improved Arterial Stiffness in Patients with Metabolic Syndrome: A Randomized Controlled Trial. *J Med Food* **2016**, *19*, 346-352, doi:10.1089/jmf.2015.3563.
10. Johnson, S.A.; Figueroa, A.; Navaei, N.; Wong, A.; Kalfon, R.; Ormsbee, L.T.; Feresin, R.G.; Elam, M.L.; Hooshmand, S.; Payton, M.E., et al. Daily blueberry consumption improves blood pressure and arterial stiffness in postmenopausal women with pre- and stage 1-hypertension: a randomized, double-blind, placebo-controlled clinical trial. *J Acad Nutr Diet* **2015**, *115*, 369-377, doi:10.1016/j.jand.2014.11.001.
11. Karlsen, A.; Paur, I.; Bohn, S.K.; Sakhi, A.K.; Borge, G.I.; Serafini, M.; Erlund, I.; Laake, P.; Tonstad, S.; Blomhoff, R. Bilberry juice modulates plasma concentration of NF-kappaB related inflammatory markers in subjects at increased risk of CVD. *Eur J Nutr* **2010**, *49*, 345-355, doi:10.1007/s00394-010-0092-0.
12. Lehtonen, H.M.; Suomela, J.P.; Tahvonen, R.; Yang, B.; Venojarvi, M.; Viikari, J.; Kallio, H. Different berries and berry fractions have various but slightly positive effects on the associated variables of metabolic diseases on overweight and obese women. *Eur J Clin Nutr* **2011**, *65*, 394-401, doi:10.1038/ejcn.2010.26.
13. Nair, A.R.; Mariappan, N.; Stull, A.J.; Francis, J. Blueberry supplementation attenuates oxidative stress within monocytes and modulates immune cell levels in adults with metabolic syndrome: a randomized, double-blind, placebo-controlled trial. *Food Funct* **2017**, *8*, 4118-4128, doi:10.1039/c7fo00815e.
14. Schell, J.; Betts, N.M.; Lyons, T.J.; Basu, A. Raspberries Improve Postprandial Glucose and Acute and Chronic Inflammation in Adults with Type 2 Diabetes. *Ann Nutr Metab* **2019**, *74*, 165-174, doi:10.1159/000497226.
15. Bhaskar, S.; Sudhakaran, P.R.; Helen, A. Quercetin attenuates atherosclerotic inflammation and adhesion molecule expression by modulating TLR-NF-kappaB signaling pathway. *Cell Immunol* **2016**, *310*, 131-140, doi:10.1016/j.cellimm.2016.08.011.

- 
16. Liao, H.H.; Zhang, N.; Meng, Y.Y.; Feng, H.; Yang, J.J.; Li, W.J.; Chen, S.; Wu, H.M.; Deng, W.; Tang, Q.Z. Myricetin Alleviates Pathological Cardiac Hypertrophy via TRAF6/TAK1/MAPK and Nrf2 Signaling Pathway. *Oxid Med Cell Longev* **2019**, *2019*, doi:10.1155/2019/6304058.
  17. Zhang, C.; Lin, G.; Wan, W.; Li, X.; Zeng, B.; Yang, B.; Huang, C. Resveratrol, a polyphenol phytoalexin, protects cardiomyocytes against anoxia/reoxygenation injury via the TLR4/NF-kappaB signaling pathway. *Int J Mol Med* **2012**, *29*, 557-563, doi:10.3892/ijmm.2012.885.
  18. Feresin, R.G.; Huang, J.; Klarich, D.S.; Zhao, Y.; Pourafshar, S.; Arjmandi, B.H.; Salazar, G. Blackberry, raspberry and black raspberry polyphenol extracts attenuate angiotensin II-induced senescence in vascular smooth muscle cells. *Food Funct* **2016**, *7*, 4175-4187, doi:10.1039/c6fo00743k.
  19. Huang, W.Y.; Liu, Y.M.; Wang, J.; Wang, X.N.; Li, C.Y. Anti-inflammatory effect of the blueberry anthocyanins malvidin-3-glucoside and malvidin-3-galactoside in endothelial cells. *Molecules* **2014**, *19*, 12827-12841, doi:10.3390/molecules190812827.
  20. Hung, C.H.; Chan, S.H.; Chu, P.M.; Tsai, K.L. Quercetin is a potent anti-atherosclerotic compound by activation of SIRT1 signaling under oxLDL stimulation. *Mol Nutr Food Res* **2015**, *59*, 1905-1917, doi:10.1002/mnfr.201500144.
  21. Li, T.; Li, F.; Liu, X.; Liu, J.; Li, D. Synergistic anti-inflammatory effects of quercetin and catechin via inhibiting activation of TLR4-MyD88-mediated NF-kappaB and MAPK signaling pathways. *Phytother Res* **2019**, *33*, 756-767, doi:10.1002/ptr.6268.
  22. Nwachukwu, J.; Srinivasan, S.; Bruno, N.; Parent, A.; Hughes, T.; Pollock, J.; Gjyshi, O.; Cavett, V.; Nowak, J.; Garcia-Ordonez, R., et al. Resveratrol modulates the inflammatory response via an estrogen receptor-signal integration network. *eLife* **2014**, *3*, doi:10.7554/eLife.02057.
  23. Olson, E.R.; Naugle, J.E.; Zhang, X.; Bomser, J.A.; Meszaros, J.G. Inhibition of cardiac fibroblast proliferation and myofibroblast differentiation by resveratrol. *Am J Physiol Heart Circ Physiol* **2005**, *288*, H1131-1138, doi:10.1152/ajpheart.00763.2004.
  24. Sivasinprasasn, S.; Pantan, R.; Thummayot, S.; Tocharus, J.; Suksamrarn, A.; Tocharus, C. Cyanidin-3-glucoside attenuates angiotensin II-induced oxidative stress and inflammation in vascular endothelial cells. *Chem Biol Interact* **2016**, *260*, 67-74, doi:10.1016/j.cbi.2016.10.022.
  25. Burton-Freeman, B.; Linares, A.; Hyson, D.; Kappagoda, T. Strawberry modulates LDL oxidation and postprandial lipemia in response to high-fat meal in overweight hyperlipidemic men and women. *J Am Coll Nutr* **2010**, *29*, 46-54, doi:10.1080/07315724.2010.10719816.
  26. Djurica, D.; Holt, R.; Ren, J.; Shindel, A.; Hackman, R.; Keen, C. Effects of a dietary strawberry powder on parameters of vascular health in adolescent males. *Br J Nutr* **2016**, *116*, 639-647, doi:10.1017/S0007114516002348.
  27. Feresin, R.G.; Johnson, S.A.; Pourafshar, S.; Campbell, J.C.; Jaime, S.J.; Navaei, N.; Elam, M.L.; Akhavan, N.S.; Alvarez-Alvarado, S.; Tenenbaum, G., et al. Impact of daily strawberry consumption on blood pressure and arterial stiffness in pre- and stage 1-hypertensive postmenopausal women: a randomized controlled trial. *Food Funct* **2017**, *8*, 4139-4149, doi:10.1039/c7fo01183k.
  28. Istas, G.; Feliciano, R.P.; Weber, T.; Garcia-Villalba, R.; Tomas-Barberan, F.; Heiss, C.; Rodriguez-Mateos, A. Plasma urolithin metabolites correlate with improvements in endothelial function after red raspberry consumption: A double-blind randomized controlled trial. *Arch Biochem Biophys* **2018**, *651*, 43-51, doi:10.1016/j.abb.2018.05.016.
  29. Kay, C.; Holub, B. The effect of wild blueberry (*Vaccinium angustifolium*) consumption on postprandial serum antioxidant status in human subjects. *Br J Nutr* **2002**, *88*, 389-397, doi:10.1079/BJN2002665.
  30. Marniemi, J.; Hakala, P.; Mäki, J.; Ahotupa, M. Partial resistance of low-density lipoprotein to oxidation in vivo after increased intake of berries. *Nutr Metab Cardiovasc Dis* **2000**, *10*, 331-337.
  31. Mathison, B.; Kimble, L.; Kaspar, K.; Khoo, C.; Chew, B. Consumption of cranberry beverage improved endogenous antioxidant status and protected against bacteria adhesion in healthy humans: a randomized controlled trial. *Nutr Res* **2014**, *34*, 420-427, doi:10.1016/j.nutres.2014.03.006.



- 
32. Mazza, G.; Kay, C.; Cottrell, T.; Holub, B. Absorption of anthocyanins from blueberries and serum antioxidant status in human subjects. *J Agric Food Chem* **2002**, *50*, 7731-7737, doi:10.1021/jf020690l.
  33. McLeay, Y.; Barnes, M.; Mundel, T.; Hurst, S.; Hurst, R.; Stannard, S. Effect of New Zealand blueberry consumption on recovery from eccentric exercise-induced muscle damage. *J Int Soc Sports Nutr* **2012**, *9*, doi:10.1186/1550-2783-9-19.
  34. Netzel, M.; Strass, G.; Kaul, C.; Bitsch, I.; Dietrich, H.; Bitsch, R. In vivo antioxidative capacity of a composite berry juice. *Food Res Int* **2002**, *35*, 213-216, doi:10.1016/S0963-9969(01)00186-7.
  35. Netzel, M.; Strass, G.; Herbst, M.; Dietrich, H.; Bitsch, R.; Bitsch, I.; Frank, T. The excretion and biological antioxidant activity of elderberry antioxidants in healthy humans. *Food Res Int* **2005**, *38*, 905-910, doi:10.1016/j.foodres.2005.03.010.
  36. Rodriguez-Mateos, A.; Rendeiro, C.; Bergillos-Meca, T.; Tabatabaee, S.; George, T.W.; Heiss, C.; Spencer, J.P. Intake and time dependence of blueberry flavonoid-induced improvements in vascular function: a randomized, controlled, double-blind, crossover intervention study with mechanistic insights into biological activity. *Am J Clin Nutr* **2013**, *98*, 1179-1191, doi:10.3945/ajcn.113.066639.
  37. Tulipani, S.; Romandini, S.; Busco, F.; Bompadre, S.; Mezzetti, B.; Battino, M. Ascorbate, not urate, modulates the plasma antioxidant capacity after strawberry intake. *Food Chem* **2009**, *117*, 181-188, doi:10.1016/j.foodchem.2009.03.096.
  38. Ding, Y.; Zhang, B.; Zhou, K.; Chen, M.; Wang, M.; Jia, Y.; Song, Y.; Li, Y.; Wen, A. Dietary ellagic acid improves oxidant-induced endothelial dysfunction and atherosclerosis: role of Nrf2 activation. *Int J Cardiol* **2014**, *175*, 508-514, doi:10.1016/j.ijcard.2014.06.045.
  39. Jin, L.; Piao, Z.H.; Sun, S.; Liu, B.; Kim, G.R.; Seok, Y.M.; Lin, M.Q.; Ryu, Y.; Choi, S.Y.; Kee, H.J., et al. Gallic Acid Reduces Blood Pressure and Attenuates Oxidative Stress and Cardiac Hypertrophy in Spontaneously Hypertensive Rats. *Sci Rep* **2017**, *7*, doi:10.1038/s41598-017-15925-1.
  40. Kalea, A.Z.; Clark, K.; Schuschke, D.A.; Kristo, A.S.; Klimis-Zacas, D.J. Dietary enrichment with wild blueberries (*Vaccinium angustifolium*) affects the vascular reactivity in the aorta of young spontaneously hypertensive rats. *J Nutr Biochem* **2010**, *21*, 14-22, doi:10.1016/j.jnutbio.2008.09.005.
  41. Kane, M.; Anselm, E.; Rattmann, Y.; Auger, C.; Schini-Kerth, V. Role of gender and estrogen receptors in the rat aorta endothelium-dependent relaxation to red wine polyphenols. *Vascul Pharmacol* **2009**, *51*, 140-146.
  42. Li, M.; Jiang, Y.; Jing, W.; Sun, B.; Miao, C.; Ren, L. Quercetin provides greater cardioprotective effect than its glycoside derivative rutin on isoproterenol-induced cardiac fibrosis in the rat. *Can J Physiol Pharmacol* **2013**, *91*, 951-959, doi:10.1139/cjpp-2012-0432.
  43. Wang, Y.; Zhang, Y.; Wang, X.; Liu, Y.; Xia, M. Supplementation with cyanidin-3-O-beta-glucoside protects against hypercholesterolemia-mediated endothelial dysfunction and attenuates atherosclerosis in apolipoprotein E-deficient mice. *J Nutr* **2012**, *142*, 1033-1037, doi:10.3945/jn.112.157701.
  44. Yan, X.; Zhang, Q.Y.; Zhang, Y.L.; Han, X.; Guo, S.B.; Li, H.H. Gallic Acid Attenuates Angiotensin II-Induced Hypertension and Vascular Dysfunction by Inhibiting the Degradation of Endothelial Nitric Oxide Synthase. *Front Pharmacol* **2020**, *11*, doi:10.3389/fphar.2020.01121.
  45. Zheng, D.; Liu, Z.; Zhou, Y.; Hou, N.; Yan, W.; Qin, Y.; Ye, Q.; Cheng, X.; Xiao, Q.; Bao, Y., et al. Urolithin B, a gut microbiota metabolite, protects against myocardial ischemia/reperfusion injury via p62/Keap1/Nrf2 signaling pathway. *Pharmacol Res* **2020**, *153*, doi:10.1016/j.phrs.2020.104655.
  46. Xu, J.W.; Ikeda, K.; Yamori, Y. Inhibitory effect of polyphenol cyanidin on TNF-alpha-induced apoptosis through multiple signaling pathways in endothelial cells. *Atherosclerosis* **2007**, *193*, 299-308, doi:10.1016/j.atherosclerosis.2006.09.006.
  47. Ruel, G.; Pomerleau, S.; Couture, P.; Lemieux, S.; Lamarche, B.; Couillard, C. Plasma matrix metalloproteinase (MMP)-9 levels are reduced following low-calorie cranberry juice supplementation in men. *J Am Coll Nutr* **2009**, *28*, 694-701, doi:10.1080/07315724.2009.10719803.

- 
48. Ahmet, I.; Spangler, E.; Shukitt-Hale, B.; Juhaszova, M.; Sollott, S.J.; Joseph, J.A.; Ingram, D.K.; Talan, M. Blueberry-enriched diet protects rat heart from ischemic damage. *PLoS One* **2009**, *4*, doi:10.1371/journal.pone.0005954.
  49. Jin, L.; Piao, Z.H.; Liu, C.P.; Sun, S.; Liu, B.; Kim, G.R.; Choi, S.Y.; Ryu, Y.; Kee, H.J.; Jeong, M.H. Gallic acid attenuates calcium calmodulin-dependent kinase II-induced apoptosis in spontaneously hypertensive rats. *J Cell Mol Med* **2018**, *22*, 1517-1526, doi:10.1111/jcmm.13419.
  50. Jin, L.; Sun, S.; Ryu, Y.; Piao, Z.H.; Liu, B.; Choi, S.Y.; Kim, G.R.; Kim, H.S.; Kee, H.J.; Jeong, M.H. Gallic acid improves cardiac dysfunction and fibrosis in pressure overload-induced heart failure. *Sci Rep* **2018**, *8*, doi:10.1038/s41598-018-27599-4.
  51. Choi, Y.J.; Kang, J.S.; Park, J.H.; Lee, Y.J.; Choi, J.S.; Kang, Y.H. Polyphenolic flavonoids differ in their antiapoptotic efficacy in hydrogen peroxide-treated human vascular endothelial cells. *J Nutr* **2003**, *133*, 985-991, doi:10.1093/jn/133.4.985.
  52. Isaak, C.K.; Petkau, J.C.; Blewett, H.; O, K.; Siow, Y.L. Lingonberry anthocyanins protect cardiac cells from oxidative-stress-induced apoptosis. *Can J Physiol Pharmacol* **2017**, *95*, 904-910, doi:10.1139/cjpp-2016-0667.
